# Supplementary material for: Assessing the effects of dealumination and bifunctionalization on 8-membered ring zeolite/zeo-type materials in the methanol-to-olefin catalytic process
Source: Royal Society of Chemistry journal article supplement (doi:10.1039/d4cy00110a), 2024-01-01
Supplement: d4cy00110a1.pdf [file d4cy00110a1.pdf]

### Queries

1. Have all of the author names been spelled and formatted correctly? Names will be indexed and cited as shown on the proof, so these must be correct. No late corrections can be made.

Correct.

2. Please check that the inserted Graphical Abstract text is suitable. If you provide replacement text, please ensure that it is no longer than 250 characters (including spaces).

Suitable.

3. "member" appears to be spelled incorrectly as "memeber" in the Graphical Abstract image. Please could you supply a corrected version (preferably as a TIF file at 600 dots per inch) with your proof corrections.

I've revised and re-uploaded it, here's the latest version.

4. Have all of the funders of your work been fully and accurately acknowledged? If not, please ensure you make appropriate changes to the Acknowledgements text.

Correct.

5. Ref. 62: Please provide the journal title, year of publication and page (or article) number(s).

On the interpretation of the NH<sub>3</sub>-TPD patterns of H-ZSM-5 and H-mordenite, *Microporous and Mesoporous Materials*, Volume 47, Issues 2–3, October 2001, Pages 293-301.

**Fig.8** The operando investigation of the MTO reaction over stand-alone and untreated CHA-based (a and b) SSZ-13, (c and d) SAPO-34, and (e and f) CCG-MTO materials: the operando UV-vis profiles (a,c,e) and mass profiles (b,d,f) of methanol conversion over zeo-type materials at 400 °C for 40 min (also see Fig. S20† for the analogous operando results over their dealuminated materials).

### Fig.1

**Figure replacement requested:** The border in the top right corner of the image export is missing and I would like to replace it again.

### Table of Contents Entry

**Figure replacement requested:** I've revised and re-uploaded it, here's the latest version.

## SI

There were some errors in the labeling, and the correct version after the correction is as follows.

**Fig. S16** Catalytic data of methanol conversion and hydrocarbon selectivity of chemically etching

(a) SAPO-34, (b) SAPO-34-0.1M CA, and (c) SAPO-34-0.05M CA zeolite materials with respect to time-on-stream (TOS) (Reaction conditions: 400 °C, WHSV=1h<sup>-1</sup>). The overlapping comparison of their (f) Methanol conversion along with (g-h) hydrocarbon/product selectivity (xM CA implies the citric acid concentration).

**Fig. S19** The operando investigation of the MTO reaction over aluminosilicate SSZ-39 and SAPO-18 zeolites: the operando UV-vis profiles (a and c) and mass profiles (b and d) of methanol conversion, based on (a and b) (SSZ-39) and (c and d) (SAPO-18), at 400 °C for 40 min.

**Fig. S20** The operando investigation of the MTO reaction over SSZ-13, SAPO-34 and CCG-MTO materials: the operando UV-vis profiles (a, c and e) and mass profiles (b, d and f) of methanol conversion, based on (a and b) (SSZ-13) , (c and d) (SAPO-34) and (e and f) (CCG-MTO) materials, at 400 °C for 40 min. (N.B.: MS-signals over SSZ-13-ST750 material remained weak in our different attempts, which could be due to product formation at a very low amount below the detection level of the instrument at the very early period of the reaction).

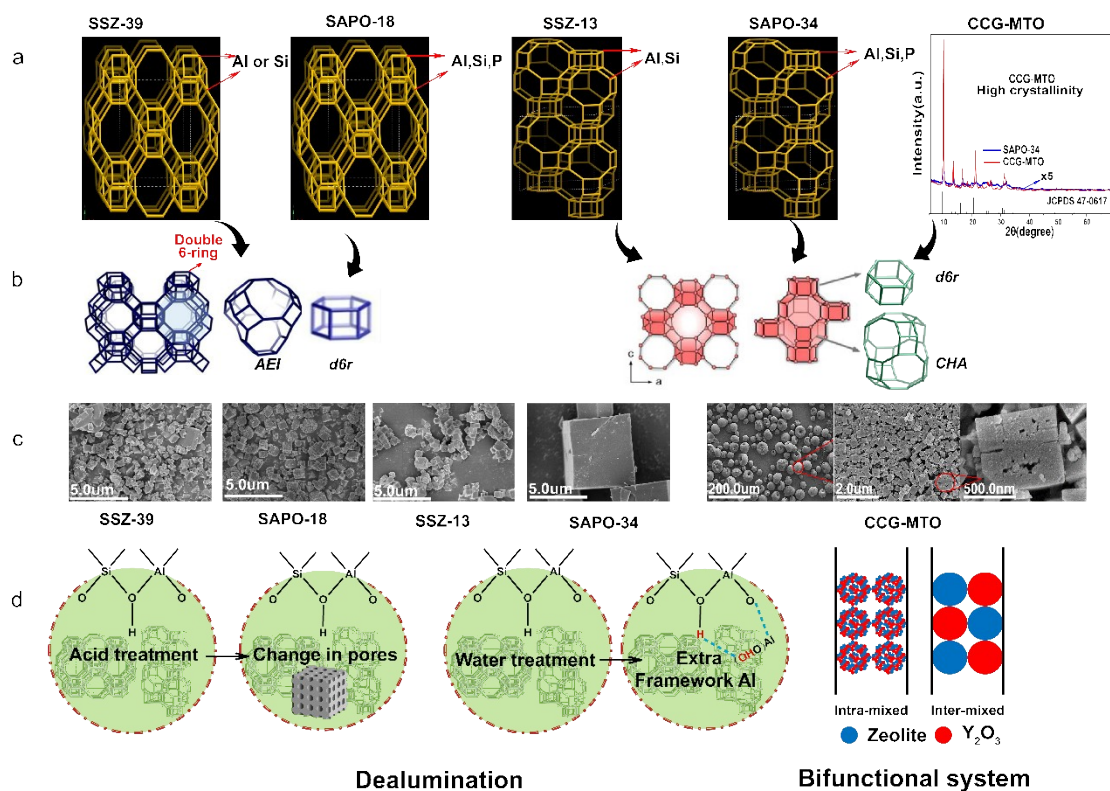

**Fig.1**

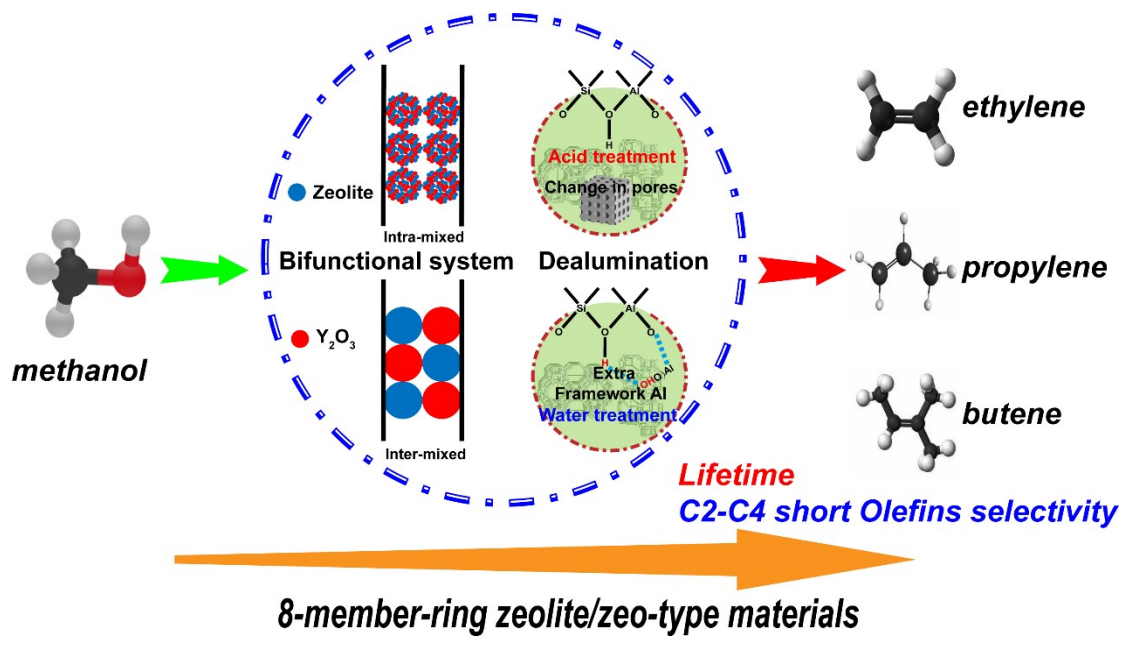

TOC
